# Supplementary material for: Homogeneously-catalyzed etherification of glycerol with 1-dodecanol
Source: Royal Society of Chemistry journal article supplement (doi:10.1039/c1cy00082a), 2011-01-01

## Homogeneously-catalyzed etherification of glycerol with 1-dodecanol

Pierrick Gaudin, Roland Jacquot, Philippe Marion, Yannick Pouilloux, and François Jérôme\*

\* Corresponding author: [francois.jerome@univ-poitiers.fr](mailto:francois.jerome@univ-poitiers.fr)

### Supporting information

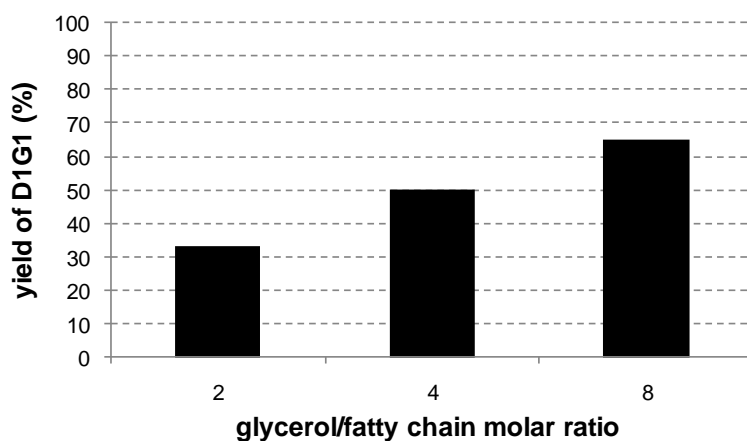

Figure S1: influence of the glycerol/fatty chain (1-dodecanol + 1-bromododecane) molar ratio on the D1G1 yield. Results were collected after 24h of reaction at 130°C

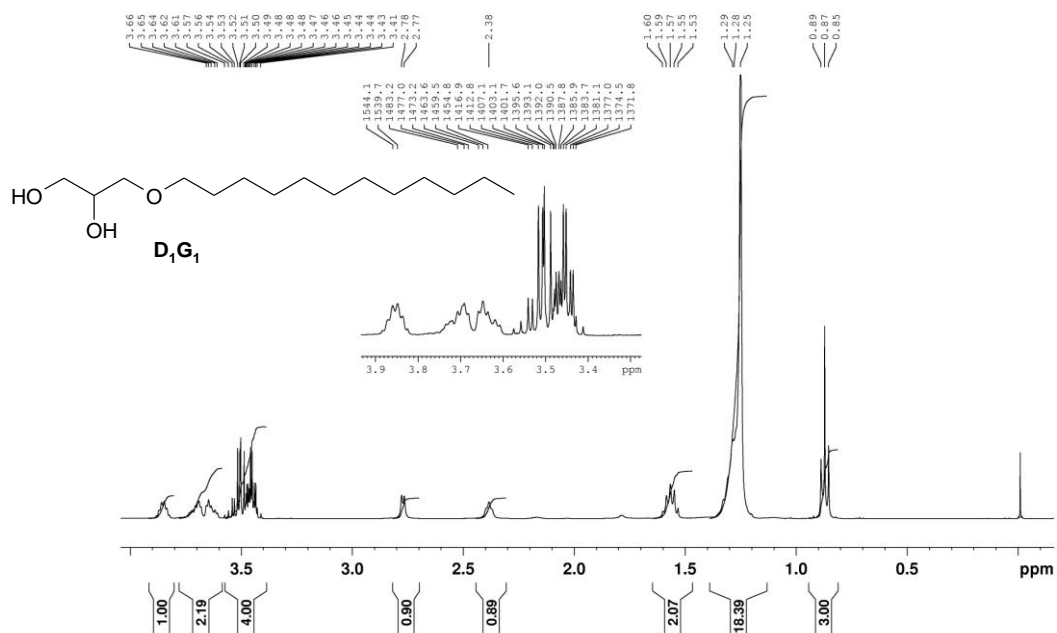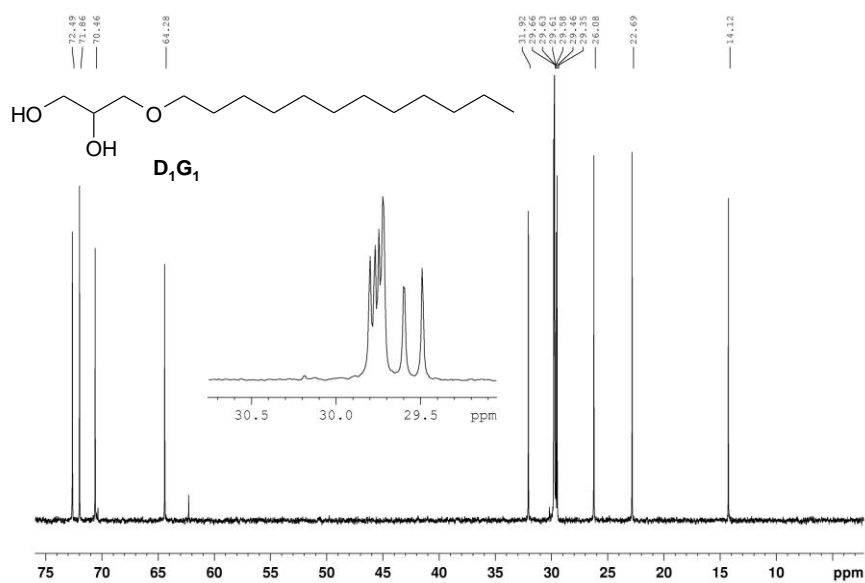

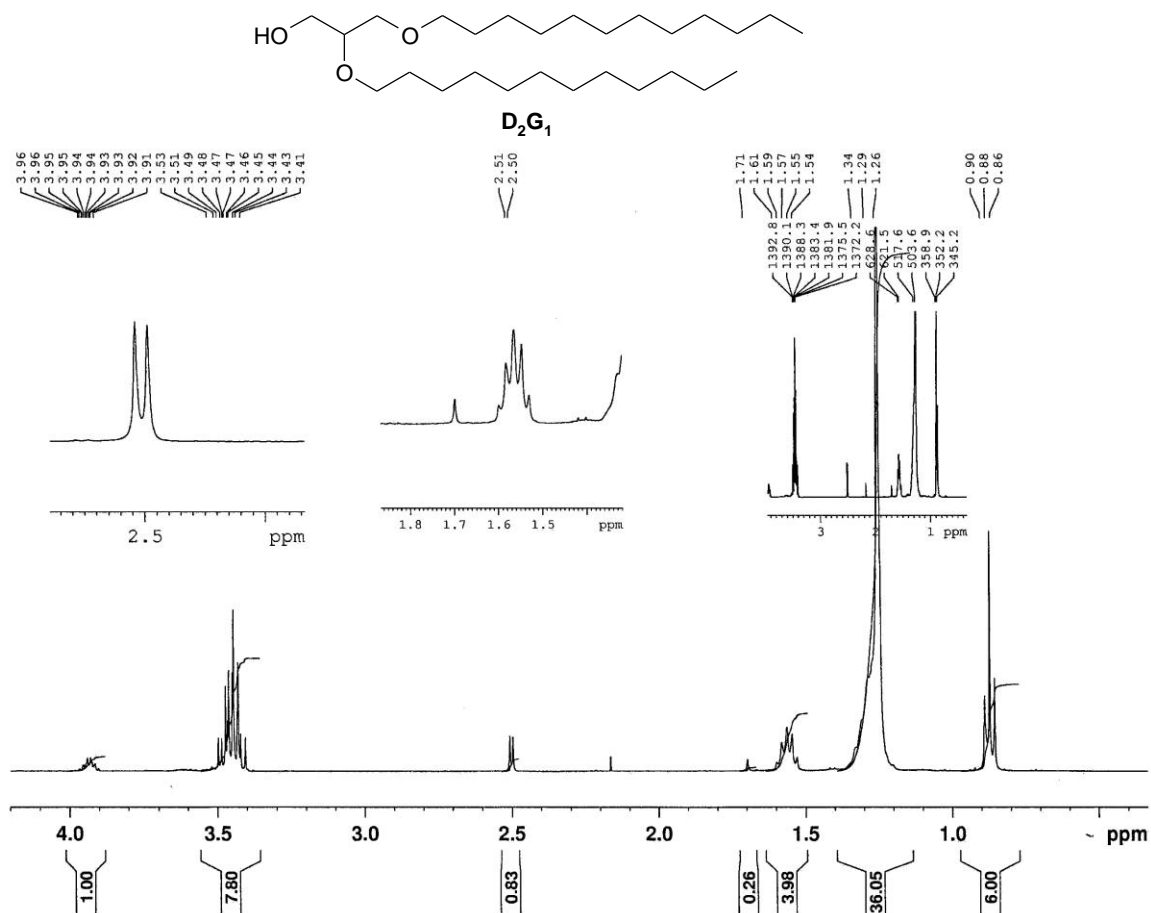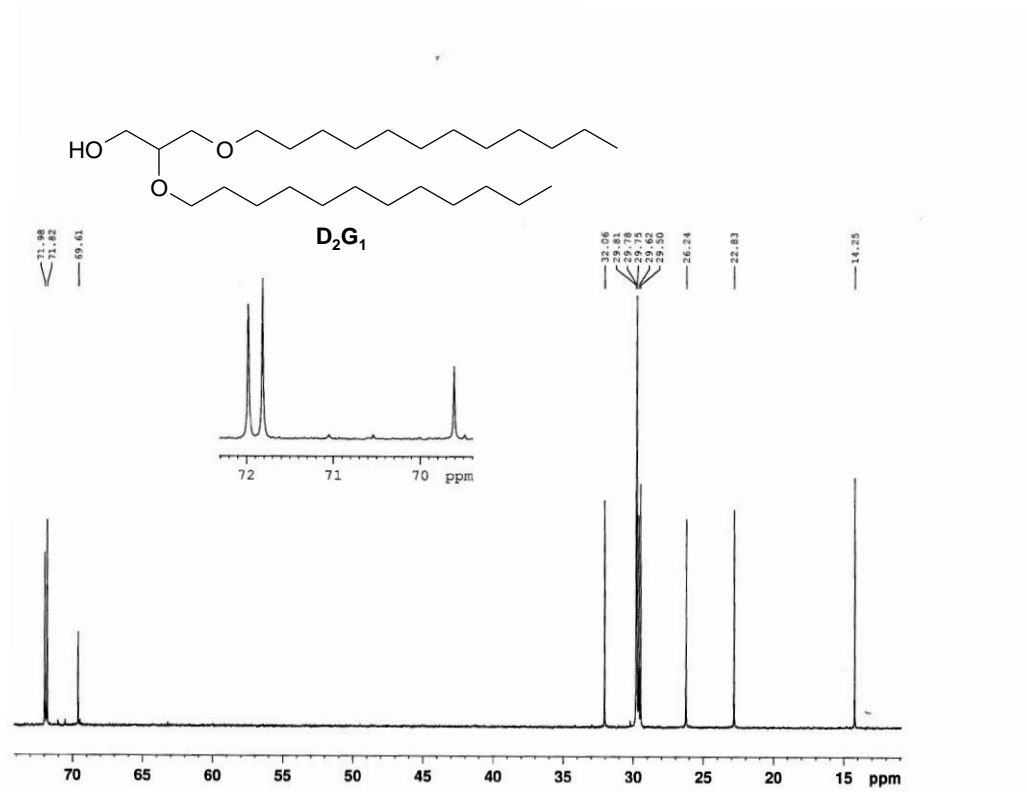

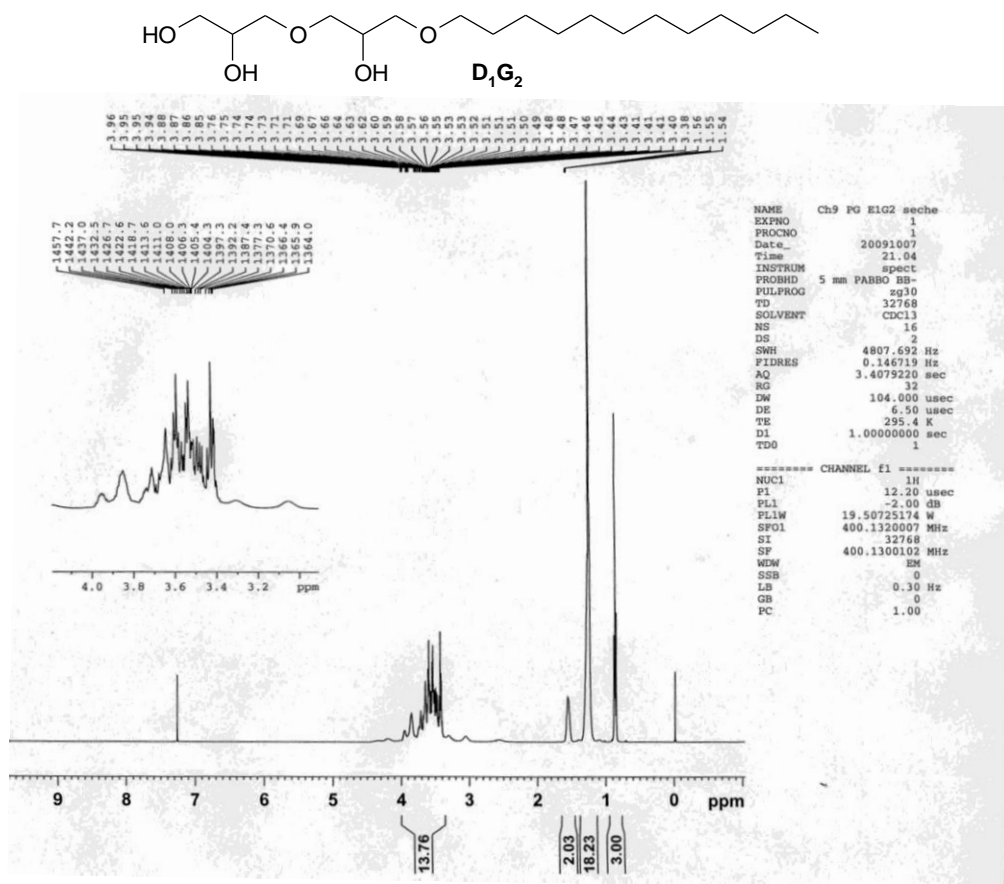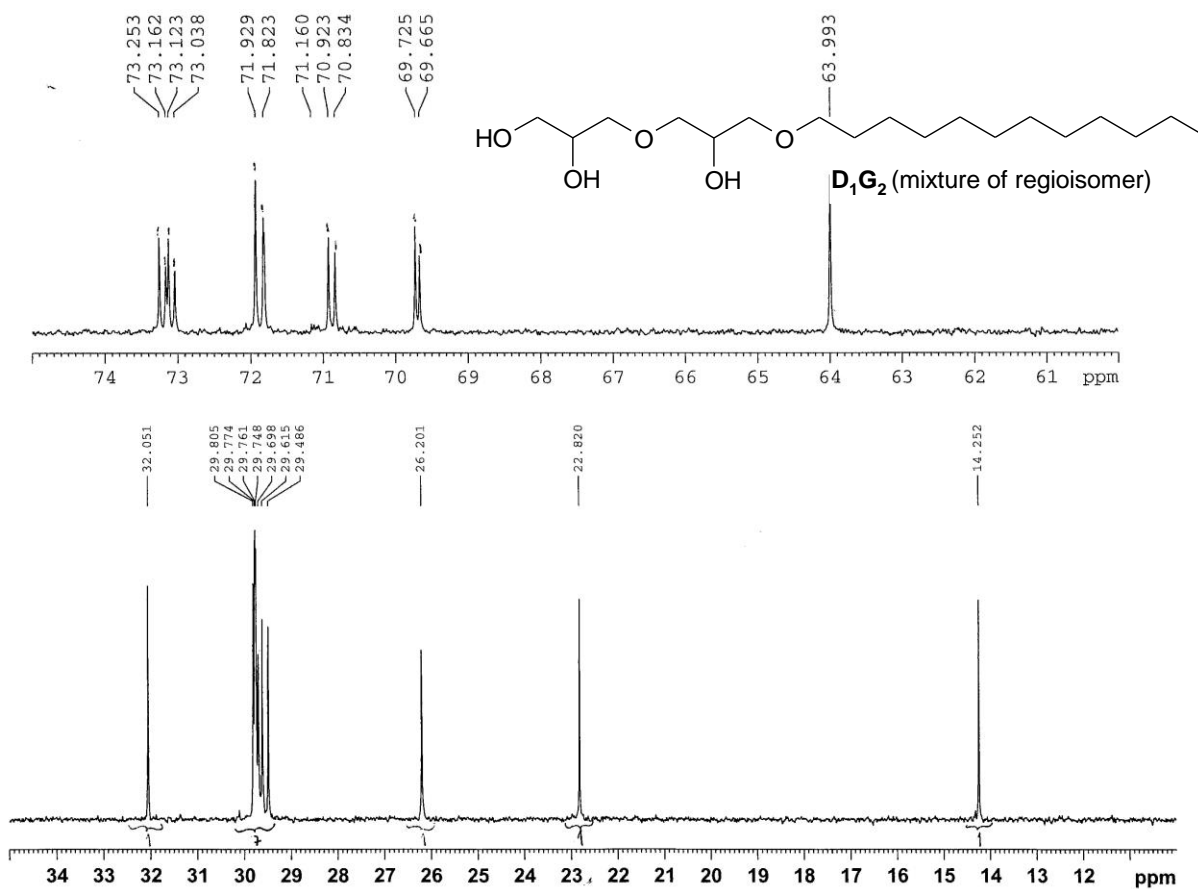

Supplement: c1cy00082a.pdf [file c1cy00082a.pdf]
